# Supplementary material for: Ethyl pyruvate inhibits oxidation of LDL in vitro and attenuates oxLDL toxicity in EA.hy926 cells
Source: PubMed Central journal article supplement (PMC5784938; doi:10.1371/journal.pone.0191477), 2018-01-25

Suppl. Fig 1

A

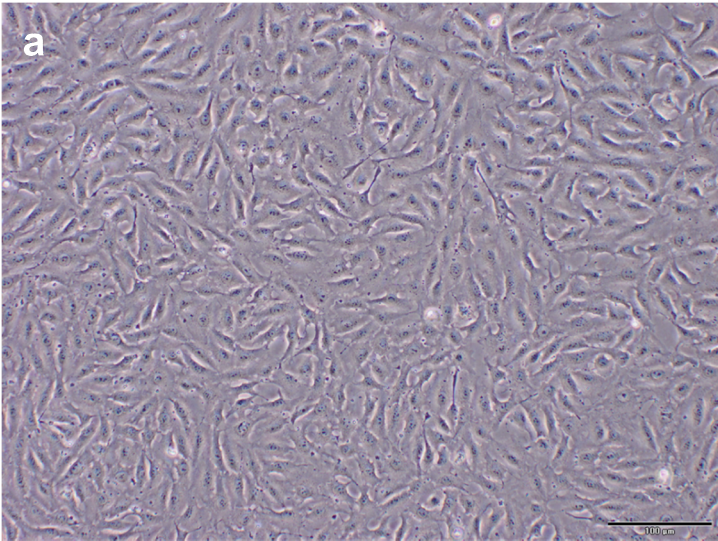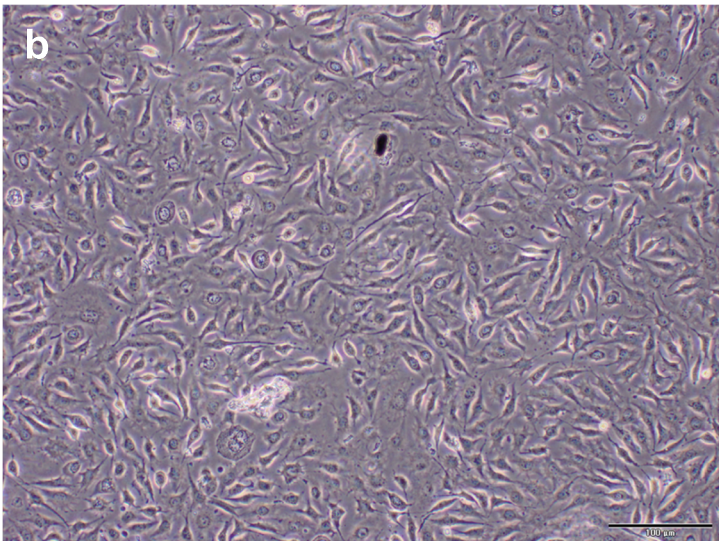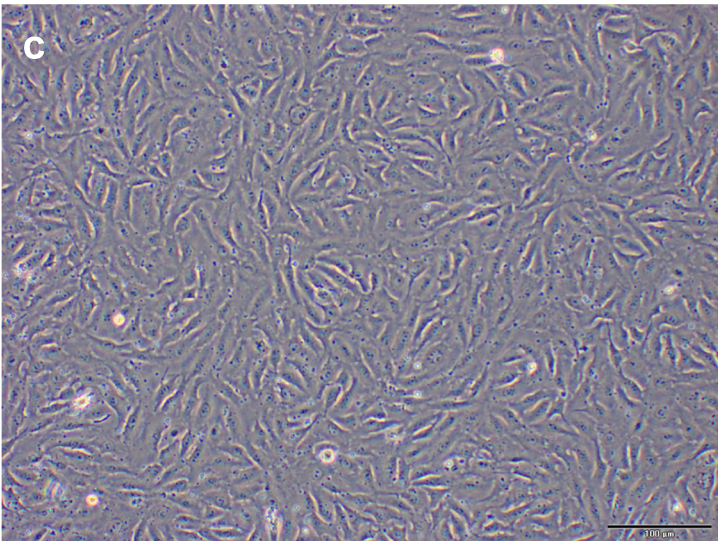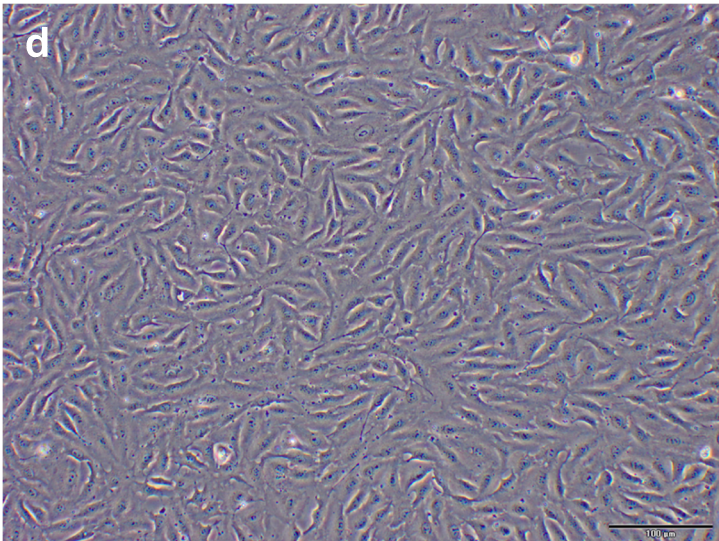

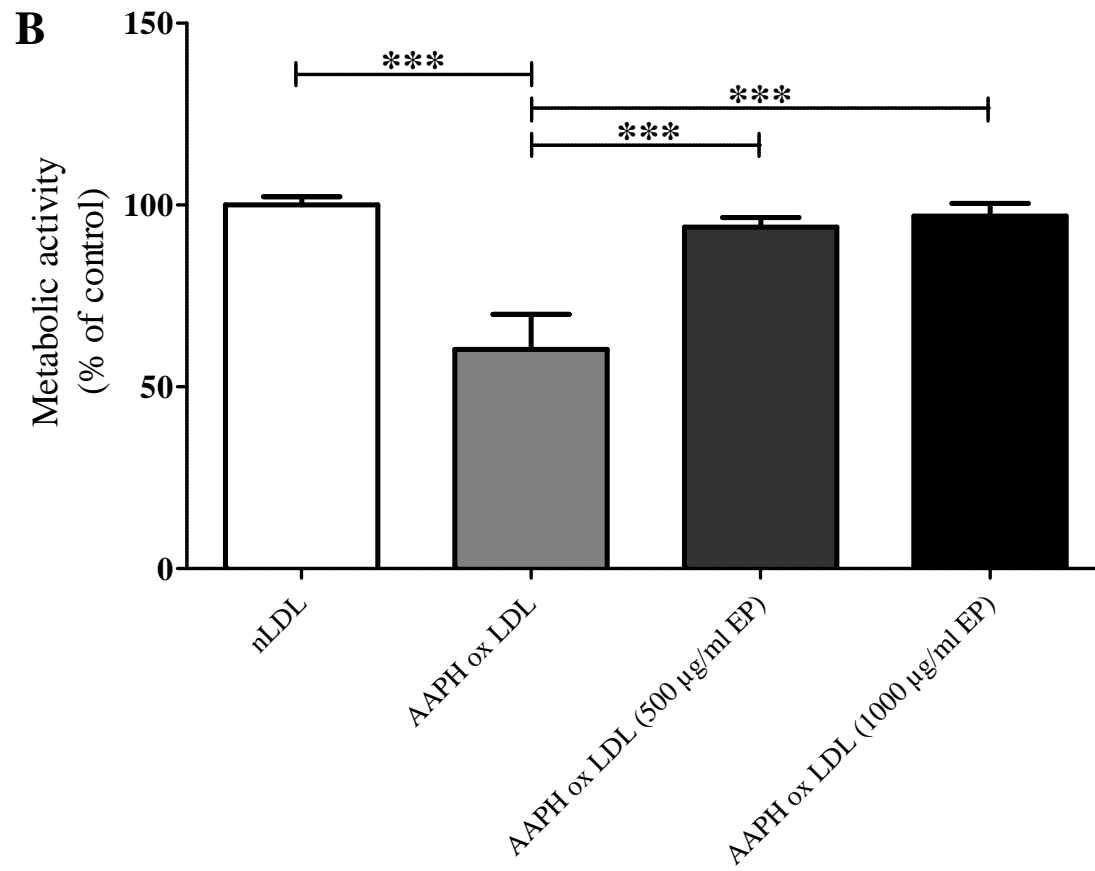

Supplement: pone.0191477.s001.pdf [file pone.0191477.s001.pdf]
